# Supplementary material for: Early Prediction of Response Focused on Tumor Markers in Atezolizumab plus Bevacizumab Therapy for Hepatocellular Carcinoma
Source: MDPI journal article supplement (doi:10.3390/cancers15112927), 2023-05-26
Supplement: s1 [file s1]

**Table S4.** Univariate and multivariate analyses for factors affecting overall survival in the low-AFP group.

| Factors                     |                  | Univariate Analysis |             |                 | Multivariate Analysis |             |                 |
|-----------------------------|------------------|---------------------|-------------|-----------------|-----------------------|-------------|-----------------|
|                             |                  | Hazard ratio        | 95% CI      | <i>p</i> -value | Hazard ratio          | 95%CI       | <i>p</i> -value |
| Age                         | < 75/≥ 75 years  | 1.495               | 0.605–3.694 | 0.3833          |                       |             |                 |
| Sex                         | Male/female      | 0.778               | 0.229–2.721 | 0.7076          |                       |             |                 |
| ECOG-PS                     | 0/1              | 0.841               | 0.245–2.891 | 0.7838          |                       |             |                 |
| Etiology                    | Viral/non-viral  | 0.618               | 0.241–1.588 | 0.3180          | 0.660                 | 0.233–1.865 | 0.4325          |
| Line                        | First/late       | 0.282               | 0.107–0.745 | 0.0106          | 0.240                 | 0.079–0.729 | 0.0118          |
| mALBI                       | 1–2a/2b          | 0.270               | 0.102–0.713 | 0.0082          | 0.138                 | 0.040–0.482 | 0.0019          |
| BCLC                        | A–B/C            | 0.602               | 0.235–1.544 | 0.2909          |                       |             |                 |
| MVI                         | Absence/presence | 0.502               | 0.180–1.398 | 0.1869          | 1.305                 | 0.413–4.119 | 0.6503          |
| EHS                         | Absence/presence | 0.296               | 0.080–1.095 | 0.0682          | 0.125                 | 0.024–0.642 | 0.0128          |
| UT7                         | IN/OUT           | 0.332               | 0.110–1.002 | 0.0682          | 0.469                 | 0.143–1.532 | 0.2099          |
| Baseline DCP<br>< 40 mAU/mL | Yes/no           | 0.110               | 0.015–0.826 | 0.0319          | 0.152                 | 0.019–1.197 | 0.0736          |

ECOG-PS, Eastern Cooperative Oncology Group performance status; BCLC, Barcelona Clinic Liver Cancer; mALBI, modified albumin-bilirubin score; MVI, macrovascular invasion; EHS, Extrahepatic spread; UT7, up-to-seven criteria; DCP, des-gamma carboxy prothrombin; CI, confidence interval
