# Supplementary material for: Early Prediction of Response Focused on Tumor Markers in Atezolizumab plus Bevacizumab Therapy for Hepatocellular Carcinoma
Source: MDPI journal article supplement (doi:10.3390/cancers15112927), 2023-05-26
Supplement: s1 [file s1]

**Table S3.** Univariate and multivariate analyses for factors affecting overall survival in the high-AFP group.

| Factors                        |                  | Univariate Analysis |             |                 | Multivariate Analysis |             |                 |
|--------------------------------|------------------|---------------------|-------------|-----------------|-----------------------|-------------|-----------------|
|                                |                  | Hazard ratio        | 95% CI      | <i>p</i> -value | Hazard ratio          | 95%CI       | <i>p</i> -value |
| Age                            | < 75/≥ 75 years  | 0.709               | 0.352–1.426 | 0.3346          |                       |             |                 |
| Sex                            | Male/female      | 1.138               | 0.537–2.413 | 0.7351          |                       |             |                 |
| ECOG-PS                        | 0/1–3            | 0.543               | 0.221–1.332 | 0.1820          |                       |             |                 |
| Etiology                       | Viral/non-viral  | 1.363               | 0.662–2.808 | 0.4003          | 2.066                 | 0.913–4.675 | 0.0816          |
| Line                           | First/late       | 1.469               | 0.709–3.044 | 0.3014          | 1.372                 | 0.626–3.008 | 0.4292          |
| mALBI                          | 1–2a/2b–3        | 0.833               | 0.415–1.672 | 0.6070          | 0.937                 | 0.440–1.996 | 0.8656          |
| BCLC                           | A–B/C            | 0.431               | 0.209–0.889 | 0.0226          |                       |             |                 |
| MVI                            | Absence/presence | 0.463               | 0.231–0.930 | 0.0305          | 0.422                 | 0.192–0.926 | 0.0314          |
| EHS                            | Absence/presence | 0.434               | 0.189–0.998 | 0.0495          | 0.588                 | 0.242–1.431 | 0.2419          |
| UT7                            | IN/OUT           | 1.070               | 0.505–2.267 | 0.8605          | 1.081                 | 0.466–2.507 | 0.8552          |
| Decrease in AFP level<br>> 30% | Yes/no           | 0.533               | 0.205–1.386 | 0.1967          | 0.430                 | 0.159–1.162 | 0.0961          |
| Baseline AFP<br>< 400 ng/mL    | Yes/no           | 0.759               | 0.373–1.543 | 0.4457          |                       |             |                 |
| Baseline DCP<br>< 40 mAU/mL    | Yes/no           | 0.802               | 0.242–2.666 | 0.7194          |                       |             |                 |

ECOG-PS, Eastern Cooperative Oncology Group performance status; BCLC, Barcelona Clinic Liver Cancer; mALBI, modified albumin-bilirubin score; MVI, macrovascular invasion; EHS, Extrahepatic spread; UT7, up-to-seven criteria; AFP, alpha-fetoprotein; DCP, des-gamma carboxy prothrombin; CI, confidence interval
