# Supplementary material for: Early Prediction of Response Focused on Tumor Markers in Atezolizumab plus Bevacizumab Therapy for Hepatocellular Carcinoma
Source: MDPI journal article supplement (doi:10.3390/cancers15112927), 2023-05-26
Supplement: s1 [file s1]

**Table S1.** Univariate and multivariate analyses for factors affecting progression-free survival in the high-AFP group.

| Factors                        |                  | Univariate Analysis |             |                 | Multivariate Analysis |             |                 |
|--------------------------------|------------------|---------------------|-------------|-----------------|-----------------------|-------------|-----------------|
|                                |                  | Hazard ratio        | 95% CI      | <i>p</i> -value | Hazard ratio          | 95%CI       | <i>p</i> -value |
| Age                            | < 75/≥ 75 years  | 1.248               | 0.646–2.410 | 0.5098          |                       |             |                 |
| Sex                            | Male/female      | 0.802               | 0.405–1.588 | 0.5265          |                       |             |                 |
| ECOG-PS                        | 0/1–3            | 0.648               | 0.284–1.479 | 0.3023          |                       |             |                 |
| Etiology                       | Viral/non-viral  | 0.754               | 0.393–1.447 | 0.3957          | 0.860                 | 0.413–1.789 | 0.6863          |
| Line                           | First/late       | 0.850               | 0.432–2.312 | 0.6387          | 0.806                 | 0.380–1.709 | 0.5738          |
| mALBI                          | 1–2a/2b–3        | 1.511               | 0.780–2.926 | 0.2207          | 1.550                 | 0.791–3.037 | 0.2015          |
| BCLC                           | A–B/C            | 0.890               | 0.464–1.705 | 0.7251          |                       |             |                 |
| MVI                            | Absence/presence | 0.974               | 0.495–1.914 | 0.9383          | 0.813                 | 0.374–1.766 | 0.6013          |
| EHS                            | Absence/presence | 1.027               | 0.466–2.263 | 0.9436          | 0.827                 | 0.366–1.869 | 0.6487          |
| UT7                            | IN/OUT           | 1.371               | 0.704–2.671 | 0.3535          | 1.247                 | 0.588–2.647 | 0.5649          |
| Decrease in AFP level<br>> 30% | Yes/no           | 0.355               | 0.147–0.854 | 0.0208          | 0.378                 | 0.148–0.970 | 0.0430          |
| Baseline AFP<br>< 400 ng/mL    | Yes/no           | 0.852               | 0.445–1.632 | 0.6297          |                       |             |                 |
| Baseline DCP<br>< 40 mAU/mL    | Yes/no           | 0.917               | 0.323–2.603 | 0.8714          |                       |             |                 |

ECOG-PS, Eastern Cooperative Oncology Group performance status; BCLC, Barcelona Clinic Liver Cancer; mALBI, modified albumin-bilirubin score; MVI, macrovascular invasion; EHS, Extrahepatic spread; UT7, up-to-seven criteria; AFP, alpha-fetoprotein; DCP, des-gamma carboxy prothrombin; CI, confidence interval
