# Supplementary material for: Early Prediction of Response Focused on Tumor Markers in Atezolizumab plus Bevacizumab Therapy for Hepatocellular Carcinoma
Source: MDPI journal article supplement (doi:10.3390/cancers15112927), 2023-05-26
Supplement: s1 [file s1]

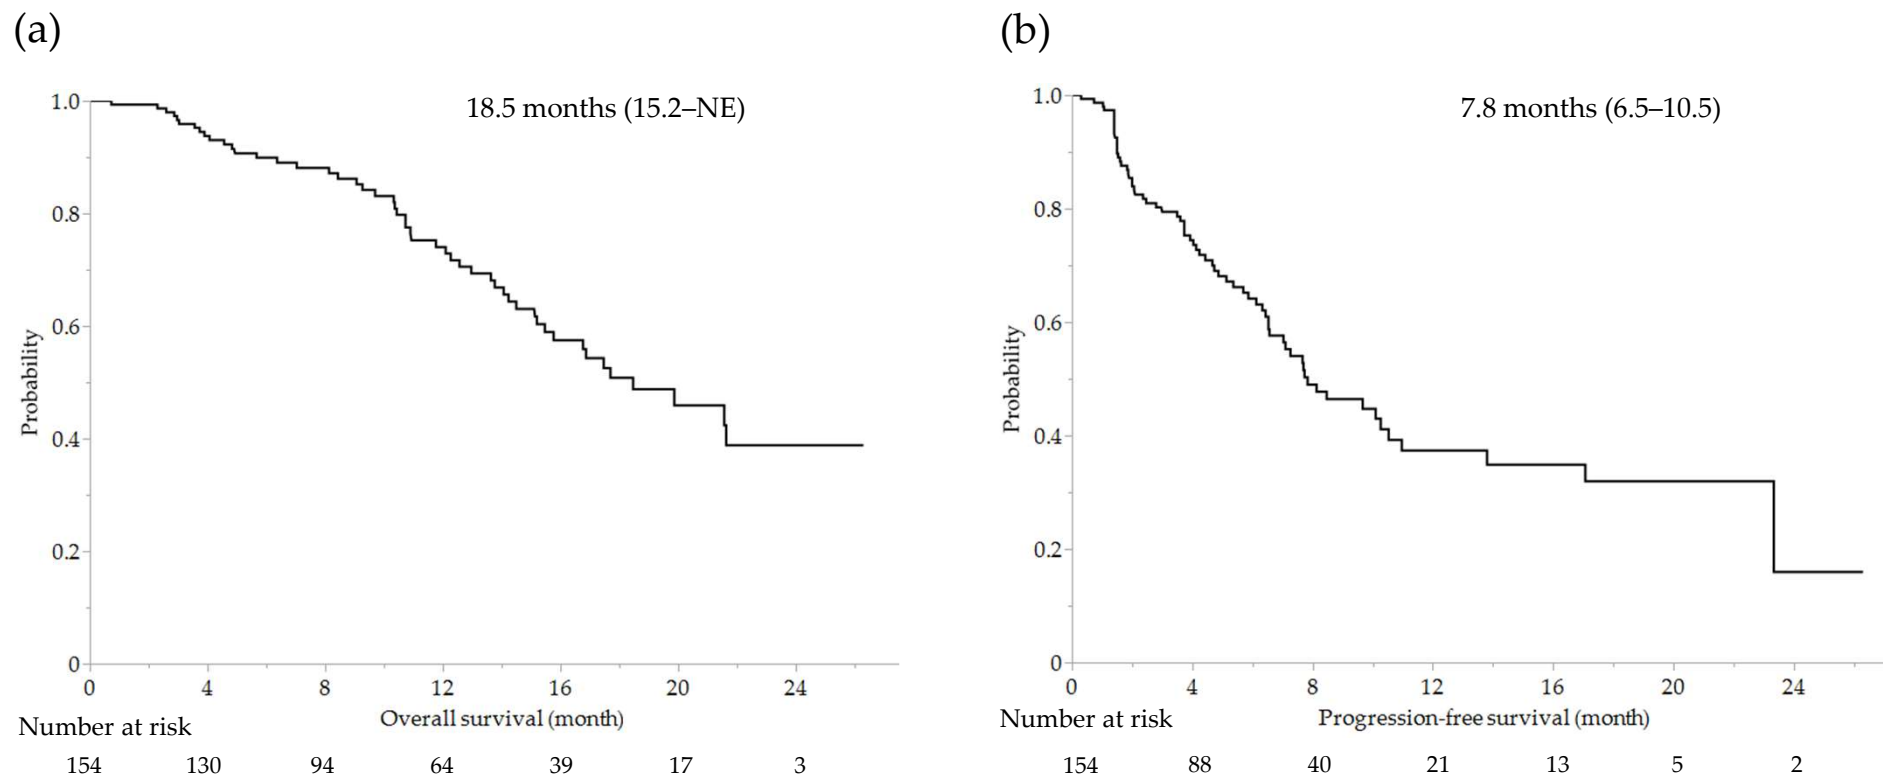

**Figure S1.** Kaplan–Meier curve for (a) overall survival and (b) progression-free survival of all patients.  
NE, not estimable
