# Supplementary material for: Early Prediction of Response Focused on Tumor Markers in Atezolizumab plus Bevacizumab Therapy for Hepatocellular Carcinoma
Source: MDPI journal article supplement (doi:10.3390/cancers15112927), 2023-05-26
Supplement: s1 [file s1]

**Table S2.** Univariate and multivariate analyses for factors affecting progression-free survival in the low-AFP group.

| Factors                     |                  | Univariate Analysis |             |                 | Multivariate Analysis |             |                 |
|-----------------------------|------------------|---------------------|-------------|-----------------|-----------------------|-------------|-----------------|
|                             |                  | Hazard ratio        | 95% CI      | <i>p</i> -value | Hazard ratio          | 95%CI       | <i>p</i> -value |
| Age                         | < 75/≥ 75 years  | 0.939               | 0.461–1.912 | 0.8621          |                       |             |                 |
| Sex                         | Male/female      | 0.822               | 0.285–2.368 | 0.7161          |                       |             |                 |
| ECOG-PS                     | 0/1              | 2.054               | 0.483–8.735 | 0.3299          |                       |             |                 |
| Etiology                    | Viral/non-viral  | 0.508               | 0.233–1.105 | 0.0878          | 0.513                 | 0.218–1.208 | 0.1268          |
| Line                        | First/late       | 0.354               | 0.173–0.725 | 0.0046          | 0.430                 | 0.202–0.917 | 0.0288          |
| mALBI                       | 1–2a/2b          | 0.539               | 0.268–1.080 | 0.0814          | 0.872                 | 0.411–1.851 | 0.7217          |
| BCLC                        | A–B/C            | 1.358               | 0.607–3.038 | 0.4570          |                       |             |                 |
| MVI                         | Absence/presence | 0.392               | 0.179–0.858 | 0.0191          | 0.484                 | 0.217–1.077 | 0.0752          |
| EHS                         | Absence/presence | 0.870               | 0.264–2.870 | 0.8189          | 1.303                 | 0.318–5.341 | 0.7133          |
| UT7                         | IN/OUT           | 0.280               | 0.119–0.656 | 0.0034          | 0.280                 | 0.108–0.728 | 0.0091          |
| Baseline DCP<br>< 40 mAU/mL | Yes/no           | 0.199               | 0.069–0.572 | 0.0027          | 0.171                 | 0.056–0.520 | 0.0019          |

ECOG-PS, Eastern Cooperative Oncology Group performance status; BCLC, Barcelona Clinic Liver Cancer; mALBI, modified albumin-bilirubin score; MVI, macrovascular invasion; EHS, Extrahepatic spread; UT7, up-to-seven criteria; DCP, des-gamma carboxy prothrombin; CI, confidence interval
