# Supplementary material for: Early Prediction of Response Focused on Tumor Markers in Atezolizumab plus Bevacizumab Therapy for Hepatocellular Carcinoma
Source: MDPI journal article supplement (doi:10.3390/cancers15112927), 2023-05-26
Supplement: s1 [file s1]

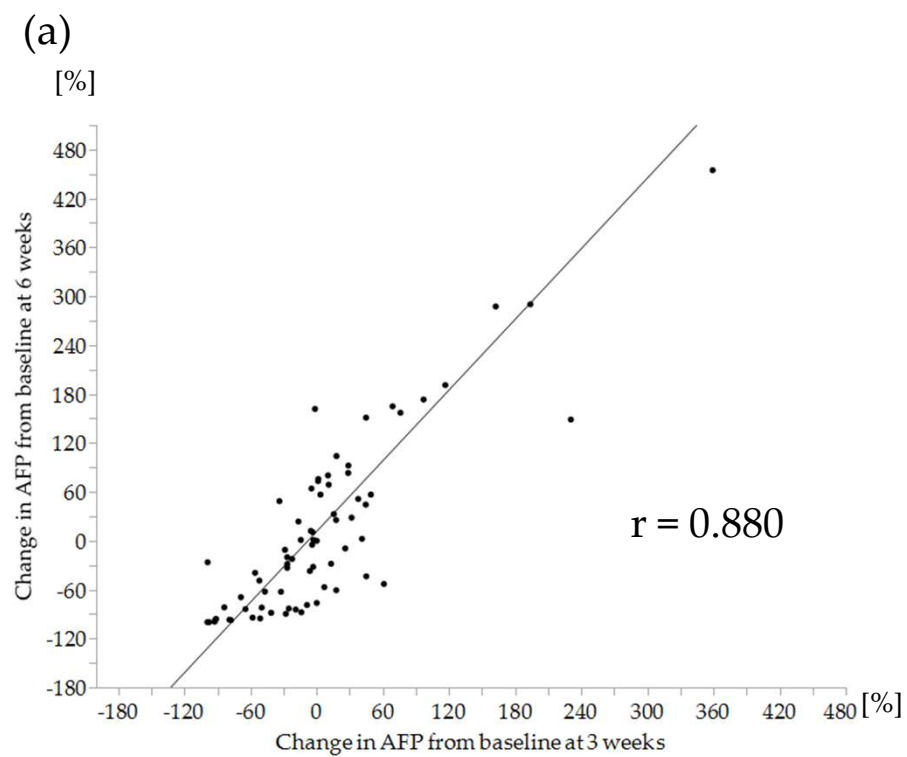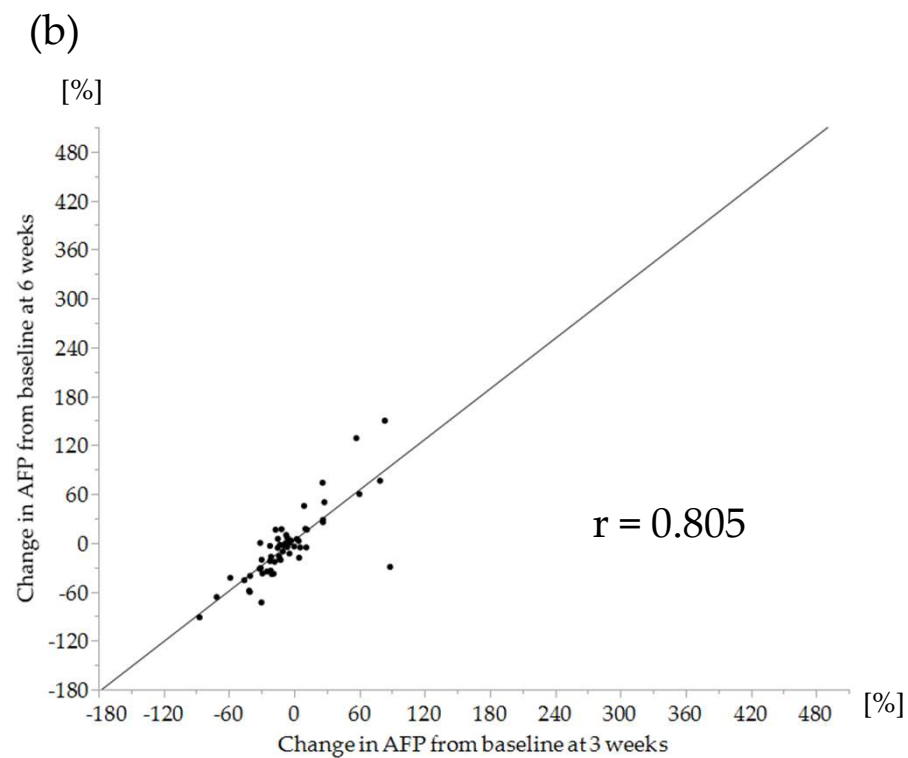

**Figure S2.** Correlation analysis between change in AFP at 3 weeks and those at 6 weeks. (a) baseline AFP  $\geq 20$  ng/mL, (b) baseline AFP  $< 20$  ng/mL
